# Supplementary material for: Reliability and Validity of the ONAPS Physical Activity Questionnaire in Assessing Physical Activity and Sedentary Behavior in French Adults
Source: MDPI journal article supplement (doi:10.3390/ijerph18115643), 2021-05-25
Supplement: s1 [file s1]

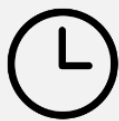

Ce questionnaire évalue votre niveau d'activité physique et de sédentarité au cours d'une **semaine habituelle** (du LUNDI au DIMANCHE). Il est divisé en 3 parties et 21 questions (de Q1 à Q21) :

- **PARTIE A** : les activités au travail ;
- **PARTIE B** : les déplacements à but utilitaire ;
- **PARTIE C** : les activités de loisirs ou au domicile.

Quelle est la date d'aujourd'hui ?

\_\_ / \_\_ / \_\_\_\_ (JJ/MM/AAAA)

Quel est votre âge ?

\_\_ (ans)

Précisez votre sexe :

Femme  Homme

Exercez-vous actuellement une activité (rémunérée ou non), ou suivez-vous des études ou une formation ?

Oui  Non → Ne pas remplir la PARTIE A ⚠

## PARTIE A : ACTIVITÉS AU TRAVAIL

Les questions suivantes concernent tout type de travail, rémunéré ou non (y compris bénévole) ainsi que les études.

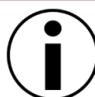

### ACTIVITÉ PHYSIQUE : COMMENT RECONNAITRE L'INTENSITÉ SELON VOTRE PERCEPTION ?

- Les activités physiques de **forte intensité** sont des activités nécessitant un effort physique important et causant une augmentation conséquente de la respiration ou du rythme cardiaque.
- Les activités physiques d'**intensité modérée** sont des activités qui demandent un effort physique modéré et causant une petite augmentation de la respiration ou du rythme cardiaque.

#### De forte intensité ? ①

Ex : soulever des charges lourdes...

NON

OUI

#### D'intensité modérée ? ②

Ex : marcher à un rythme normal ou soutenu, soulever des charges légères...

NON

OUI

Q1 Votre travail implique-t-il des tâches répétitives ou régulières :

*si ✓ NON pour les deux types d'intensité, passez directement à la question Q4.*

#### De forte intensité ①

Nombre de jours :  (par semaine, 7 maximum)

:   
heures minutes  
(par jour)

#### D'intensité modérée ②

Nombre de jours :  (par semaine, 7 maximum)

:   
heures minutes  
(par jour)

Q2 Habituellement, combien de jours par semaine effectuez-vous ces tâches répétitives ou régulières dans le cadre de votre travail ?

Q3 Lors d'une journée durant laquelle vous effectuez ces tâches, combien de temps en moyenne consacrez-vous à ces tâches dans le cadre de votre travail ?

Q4 Habituellement, combien de temps par jour en moyenne passez-vous assis pour votre travail ? (⚠ ne pas compter les temps de repas)

Heures : minutes :  :  (par jour)

## PARTIE B : DÉPLACEMENTS À BUT UTILITAIRE

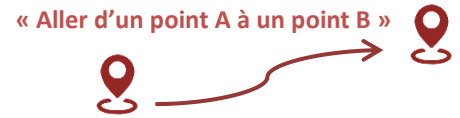

Les questions suivantes concernent la façon habituelle de vous déplacer d'un endroit à l'autre, par exemple pour aller au travail, faire des courses, aller au marché, aller chez un ami, se rendre sur un lieu de visite ou de balade...

|                                                                                                                                                                                                                                                                                         | À pied ?<br><br><small>① trajet(s) à pied durant au moins 10 minutes</small>   | À vélo ou VAE ?<br><br><small>① VAE = vélo à assistance électrique</small>            | Autre mode de déplacement ACTIF ?<br><small>① Ex : roller, trottinette... requérant une propulsion par vos mouvements</small> |
|-----------------------------------------------------------------------------------------------------------------------------------------------------------------------------------------------------------------------------------------------------------------------------------------|--------------------------------------------------------------------------------|---------------------------------------------------------------------------------------|-------------------------------------------------------------------------------------------------------------------------------|
| <b>Q5</b> Lors d'une semaine habituelle (week-end inclus), effectuez-vous des <b>déplacements</b> :<br><br><small>① si ✓ NON pour les trois types de déplacement, passez directement à la question Q8.</small>                                                                          | <input type="checkbox"/> NON <input type="checkbox"/> OUI                      | <input type="checkbox"/> NON <input type="checkbox"/> OUI                             | <input type="checkbox"/> NON <input type="checkbox"/> OUI                                                                     |
| <b>Q6</b> Habituellement, <b>combien de jours par semaine en moyenne</b> effectuez-vous ces trajets ?                                                                                                                                                                                   | <b>À pied :</b><br>Nombre de jours : <input type="text"/> (par semaine, 7 max) | <b>À vélo ou VAE :</b><br>Nombre de jours : <input type="text"/> (par semaine, 7 max) | <b>Autre mode de déplacement actif :</b><br>Nombre de jours : <input type="text"/> (par semaine, 7 max)                       |
| <b>Q7</b> Lors d'une <u>journée</u> durant laquelle vous effectuez ces trajets, <b>combien de temps en moyenne</b> y consacrez-vous ?                                                                                                                                                   | <input type="text"/> heures : <input type="text"/> minutes<br>(par jour)       | <input type="text"/> heures : <input type="text"/> minutes<br>(par jour)              | <input type="text"/> heures : <input type="text"/> minutes<br>(par jour)                                                      |
| <b>Q8</b> Lors d'une semaine habituelle (week-end inclus), utilisez-vous des <b>moyens de transport motorisés*</b> pour certains de vos déplacements ?<br><small>* Ex : en voiture, moto, scooter, assis dans les transports en commun... (⚠ hors vélo à assistance électrique)</small> |                                                                                |                                                                                       |                                                                                                                               |
| <input type="checkbox"/> NON <input type="checkbox"/> OUI                                                                                                                                                                                                                               |                                                                                |                                                                                       |                                                                                                                               |
| <b>Q9</b> Habituellement, <b>combien de jours par semaine</b> effectuez-vous ces trajets motorisés ?                                                                                                                                                                                    |                                                                                |                                                                                       |                                                                                                                               |
| Nombre de jours : <input type="text"/> (par semaine, 7 max)                                                                                                                                                                                                                             |                                                                                |                                                                                       |                                                                                                                               |
| <b>Q10</b> Lors d'une <u>journée</u> durant laquelle vous effectuez ces trajets motorisés, <b>combien de temps en moyenne</b> durent l'ensemble de ces trajets ?                                                                                                                        |                                                                                |                                                                                       |                                                                                                                               |
| <input type="text"/> heures : <input type="text"/> minutes<br>(par jour de pratique)                                                                                                                                                                                                    |                                                                                |                                                                                       |                                                                                                                               |

## PARTIE C : ACTIVITÉS DE LOISIRS OU AU DOMICILE

Les questions suivantes excluent les activités liées au travail et aux déplacements que vous avez déjà mentionnés.

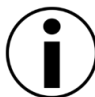

### ACTIVITÉ PHYSIQUE : COMMENT RECONNAITRE L'INTENSITÉ SELON VOTRE PERCEPTION ?

1 Les activités physiques de **forte intensité** sont des activités nécessitant un effort physique important et causant une augmentation conséquente de la respiration ou du rythme cardiaque.

2 Les activités physiques d'**intensité modérée** sont des activités qui demandent un effort physique modéré et causant une petite augmentation de la respiration ou du rythme cardiaque.

Q11 Lors d'une semaine habituelle (week-end inclus), effectuez-vous des **tâches ménagères au domicile, à l'intérieur ou à l'extérieur** ? Ex : passer l'aspirateur, laver le sol, balayer, laver les vitres, tondre la pelouse...

NON

OUI

Q12 Habituellement, **combien de jours par semaine** effectuez-vous ces tâches ménagères au domicile, à l'intérieur ou à l'extérieur ?

Nombre de jours :  
(par semaine, 7 max)

Q13 Lors d'une journée durant laquelle vous pratiquez ces tâches ménagères au domicile, **combien de temps en moyenne** y consacrez-vous ?

:   
heures minutes  
(par jour de pratique)

Q14 Lors d'une semaine habituelle (week-end inclus), pratiquez-vous des **activités sportives** ou des **activités physiques de loisirs** :

*si ✓ NON pour les deux types d'intensité, passez directement à la question Q17.*

#### De forte intensité ? 1

Ex : courir, jouer au football, porter des charges lourdes, nager, jouer au squash, pratiquer des arts martiaux, faire de la zumba, faire du vélo à un rythme soutenu ou sur des pentes (hors VAE), etc.

NON

OUI

#### D'intensité modérée ? 2

Ex : marcher à un rythme normal ou soutenu (hors trajet utilitaire), faire du vélo ou du VAE à un rythme modéré (hors trajet utilitaire), randonner, danser, jardiner, faire une séance de gym ou de renforcement musculaire, jouer au ping-pong, etc.

NON

OUI

Q15 Habituellement, **combien de jours par semaine** pratiquez-vous ces activités sportives ou ces activités de loisirs ?

#### De forte intensité 1

Nombre de jours :   
(par semaine, 7 maximum)

#### D'intensité modérée 2

Nombre de jours :   
(par semaine, 7 maximum)

Q16 Lors d'une journée durant laquelle vous pratiquez ces activités sportives ou ces activités de loisirs, **combien de temps en moyenne** y consacrez-vous ?

:   
heures minutes  
(par jour)

:   
heures minutes  
(par jour)

**Q17** Lors d'une semaine habituelle, passez-vous du temps à des **activités assises ou allongées** (hors sommeil), **chez vous** ou lors de **vos loisirs** ?

*ⓘ si ✓ **NON** pour les deux types d'activités, passez directement à la question Q20.*

**Devant un écran ?**

Ex : télévision, jeux vidéo, ordinateur à but non professionnel (internet, emails...), tablette, smartphone, etc.

**NON**

**OUI**

**Autres que devant un écran ?**

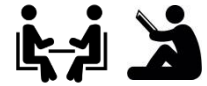

Ex : lecture, dessin, discussion avec des amis, couture, etc.

**NON**

**OUI**

**Q18** Habituellement, lors de **combien de jours par semaine** passez-vous du temps à ces activités assises ou allongées, chez vous ou lors de vos loisirs ?

**Devant un écran ?**

Nombre de jours :    
(par semaine, 7 maximum)

**Autres que devant un écran ?**

Nombre de jours :    
(par semaine, 7 maximum)

**Q19** Lors d'une journée durant laquelle vous passez du temps à ces activités assises ou allongées, **combien de temps en moyenne** y passez-vous, chez vous ou lors de vos loisirs ?

:   
heures minutes  
(par jour)

:   
heures minutes  
(par jour)

**Q20** Veuillez **préciser la nature du ou des sport(s)** que vous pratiquez lors de vos loisirs, en fonction de leur **fréquence** de pratique :

**+****+****+**  
Au moins **3 fois** par semaine ?

**+****+**  
**1 à 2 fois** par semaine ?

**+**  
**Plus d'1 fois** par mois, mais **moins d'1 fois** par semaine ?

*ⓘ Veuillez inscrire le ou les sport(s) pratiqué(s)*

.....  
.....  
.....

**Aucun**

*ⓘ Veuillez inscrire le ou les sport(s) pratiqué(s)*

.....  
.....  
.....

**Aucun**

*ⓘ Veuillez inscrire le ou les sport(s) pratiqué(s)*

.....  
.....  
.....

**Aucun**

**Q21** Quelle est votre **catégorie socioprofessionnelle** ?

*ⓘ Veuillez ne cocher qu'une seule case ; si actuellement au chômage, veuillez cocher votre catégorie antérieure.*

- Agriculteurs exploitants
- Artisans, commerçants et chefs d'entreprise
- Employés (employé de bureau ou de commerce, garde d'enfants, agent de service...)
- Cadres et professions intellectuelles supérieures (ingénieur, médecin...)

- Ouvriers (y compris agricoles)
- Professions intermédiaires (professeur des écoles, infirmier, assistant social, technicien, contremaître...)
- Retraités
- Étudiants
- Autres inactifs (par exemple parent au foyer)
